# Supplementary material for: Sedoheptulose accumulation under CO2 enrichment in leaves of Kalanchoë pinnata: a novel mechanism to enhance C and P homeostasis?
Source: PubMed Central journal article supplement — J Exp Bot. 2013 Feb 1;64(6):1497–507. doi: 10.1093/jxb/ert010 (PMC3617823; doi:10.1093/jxb/ert010), 2013-02-01
Supplement: supp_ert010_jexbot085092_file001.pdf [file supp_ert010_jexbot085092_file001.pdf]

1 Supplements

2

3 **Sedoheptulose accumulation under CO<sub>2</sub> enrichment in leaves of *Kalanchoë***  
4 ***pinnata*: a novel mechanism to enhance C and P homeostasis?**

5

6 Johan Ceusters<sup>1,2</sup>, Christof Godts<sup>1</sup>, Darin Peshev<sup>3</sup>, Rudy Vergauwen<sup>3</sup>, Natalia  
7 Dyubankova<sup>4</sup>, Eveline Lesclinier<sup>4</sup>, Maurice P. De Proft<sup>1</sup>, Wim Van den Ende<sup>3\*</sup>

8

9

10

11

12

13

14

15

16

17

18

19

20

21

22

23

24 Table S1: Sedoheptulose-7-phosphate (S7P) phosphatase activities and  
25 sedoheptulose concentrations in leaves derived from sucrose-induced (200 mM, 2d)  
26 stem fragments of *Sedum spectabile* as compared to an untreated control.

| 27 | S7P phosphatase activity                           | Sedoheptulose |      |
|----|----------------------------------------------------|---------------|------|
| 28 | (nmol mg <sup>-1</sup> protein min <sup>-1</sup> ) | (mM)          |      |
| 29 |                                                    |               |      |
|    | Control                                            | 25            | 6.7  |
|    | Sucrose (2d)                                       | 490           | 15.5 |

30

31

32

33

34

35

36

37

38

39

40

41

42

43

44

45

46

47 Figure S1

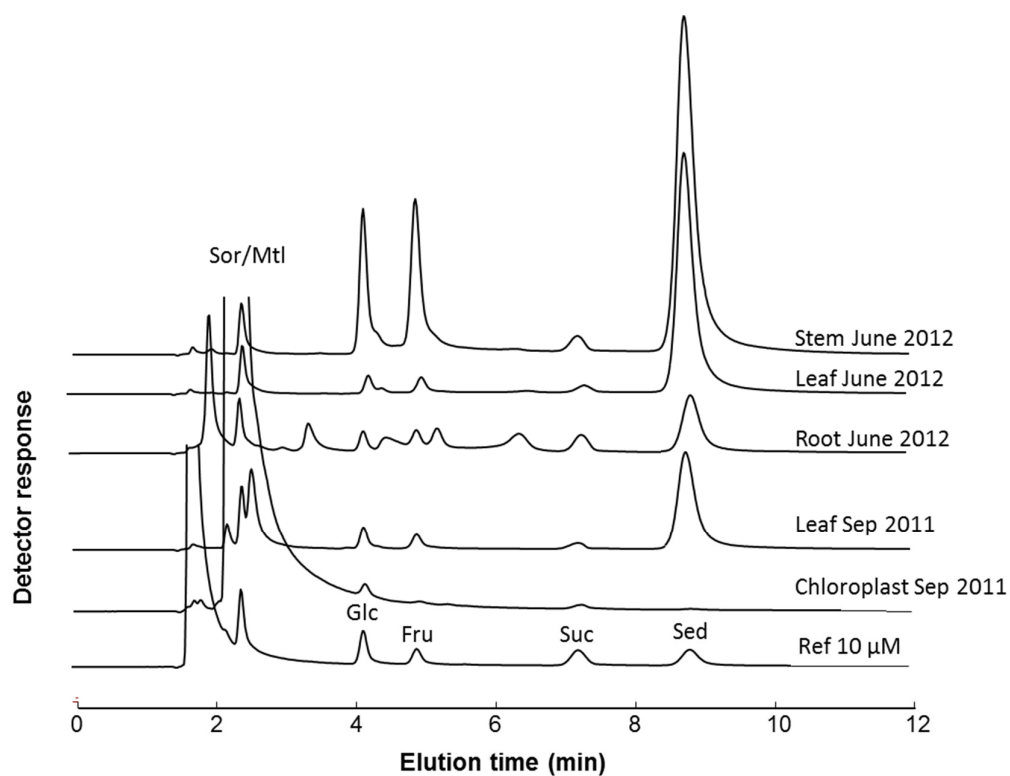

48

49

50

51 Figure S1. Typical chromatograms showing the sugar composition of different  
52 organs and isolated chloroplasts of *S. spectabile*. The reference chromatogram is  
53 displayed at the bottom showing 10  $\mu$ M glucose (Glc), fructose (Fru), sucrose (Suc),  
54 and sedoheptulose (Sed). Sorbitol (Sor) originates from the chloroplast preparation  
55 method and mannitol (Mtl) was used as internal standard.

56

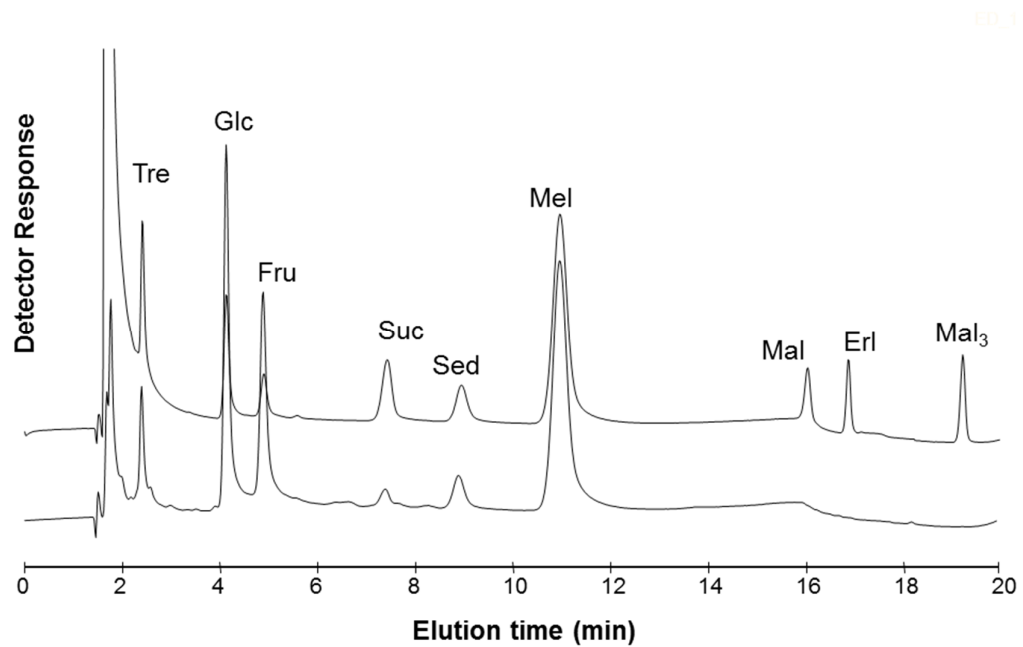

58

59

60 Figure S2: Typical chromatogram showing the sugar composition of honeydew from  
61 *S. spectabile* resident aphids. The reference chromatogram is displayed on top  
62 showing 10  $\mu$ M trehalose (Tre), glucose (Glc), fructose (Fru), sucrose (Suc),  
63 sedoheptulose (Sed), maltose (Mal), erlose (Erl), maltotriose (Mal<sub>3</sub>) and 40  $\mu$ M  
64 melezitose (Mel).

65

66
